# Supplementary material
Source: HighWire-hosted journal article supplement (https://cmajopen-stage.highwire.org/highwire/filestream/81354/field_highwire_adjunct_files/1/2019-0087-original-submission.pdf)
Supplement: 2019-0087-original-submission.pdf [file 2019-0087-original-submission.pdf]

**TITLE:**

**Differential association of household income with contraceptive methods among female youth: Results from the Canadian Community Health Survey (2009–10 and 2013–14)**

**Authors:**

\*Elizabeth Nethery, MSc, MSM (1)

Laura Schummers, ScD, (2) (3)

K. Suzanne Maginley, MSc (1)

Sheila Dunn, MD, MSc (3) (4)

Wendy V. Norman, MD, MHSc, (1) (2)

**Affiliations:**

1 School of Population and Public Health, University of British Columbia

2 Department of Family Practice, University of British Columbia

3 Department of Family and Community Medicine, University of Toronto

4 Women's College Research Institute, Toronto

\* **Corresponding author:** Elizabeth Nethery – email: [elizabeth.nethery@alumni.ubc.ca](mailto:elizabeth.nethery@alumni.ubc.ca)

**Competing interests:** None declared.

**Funding Statement:** The authors received no financial support for the research, authorship, and/or publication of this article. EN is supported by a Vanier Canada Graduate Scholarship. LS is supported by a Michael Smith Foundation for Health Research Trainee Award (Grant number 17934) and a Postdoctoral Health System Impact Fellowship co-funded by the BC Ministry of Health (grant number 18183) and the Canadian Institutes for Health Research (grant number HI7-160383). WVN is supported as a Scholar of the Michael Smith Foundation for Health Research (2012-5139 HSR), and as an Applied Public Health Research Chair by the Canadian Institutes of Health Research and Public Health Agency of Canada (CPP-329455-107837). Infrastructure support was provided for WVN and LS by the Women's Health Research Institute of the Provincial Health Services Authority of British Columbia. WVN is a member of the Board of Directors of the Society for Family Planning. Sheila Dunn receives research support from the Department of Family and Community Medicine, University of Toronto and Women's College Research Institute, Toronto.

## **Abstract**

**Background:** Low socioeconomic status is one of many barriers that may limit access to family planning services. We aimed to examine the relationship between household income and contraceptive methods among female youth in Canada.

**Methods:** Our study population included sexually active females aged 15–24 who were trying to avoid pregnancy. We used cross-sectional data from the 2009–2010 and 2013–2014 Canadian Community Health Surveys to compare household income and other sociodemographic covariates for those using oral contraceptives, injectable contraceptives, condoms or a dual method (condoms plus an oral or injectable contraceptive).

**Results:** Among female youth at risk for unintended pregnancy, 59% used oral contraceptives, 29% used dual methods, 17% used condoms only, 2.5% used injectables and 14% did not use contraception. In multiple regression models, lower household income (<\$80,000 per year) was associated with decreased use of oral contraceptives (relative risk [RR] 0.85, 95% confidence interval [CI] 0.80–0.91) and dual methods (RR 0.81, 95% CI 0.71–0.91); increased use of condoms (RR 1.36, 95% CI 1.1–1.7) and injectables (RR 1.69, 95% CI 0.98–2.9), and a greater risk of contraceptive non-use (RR 1.19, 95% CI 0.94–1.5).

**Interpretation:** We found that lower household income was associated with decreased use of oral contraceptives and increased reliance on injectable contraceptives and condoms-only. Young, low-income females may face barriers to accessing the full range of contraceptive methods available in Canada. Easier access to affordable contraception may decrease the number of female youth at risk of unintended pregnancy due to financial barriers.

## **Introduction**

Access to safe and reliable contraception is critical for reproductive-aged females and their male partners. On average, Canadian females aged 30 and older spend three years trying to conceive, pregnant, or immediately postpartum (1), while the remainder of their reproductive years are spent trying to avoid pregnancy. An estimated 30–40% of pregnancies in Canada are unintended (1,2). As a public health measure, equitable access to affordable contraception supports healthy spacing between planned pregnancies, reduces the number of high-risk pregnancies (3) and decreases avoidable health care expenditures associated with unintended pregnancies (2,4). Despite growing evidence of the benefits associated with increasing access to contraception, both publicly-funded provincial and private insurance plans often limit access to the full range of contraceptive options available in Canada.

In Canada and worldwide, adolescents and young adults are disproportionately impacted by unintended pregnancy (5,6). Other vulnerable groups include recent immigrants, rural residents and those of lower socioeconomic status (7). Canadian researchers have identified numerous barriers to contraceptive use, including high cost, lack of education about options; peer/partner pressure; access to care; and limitations in health care providers' knowledge or counseling (8–11).

Among contraceptives currently available in Canada, intrauterine contraceptives (IUCs) are the most effective at preventing unintended pregnancy (99.2–99.8% effective); followed by injectable medications (94%); combined hormonal contraceptives, including oral contraceptives (OCs); transdermal patches and intravaginal rings (all 91%); and condoms (70–80%) (3).

Effective contraceptive methods are underutilized in Canada, particularly among vulnerable populations (3). Although oral contraceptives are the most commonly used hormonal method in Canada (12), over 50% of youth report using condoms only (1), which may be due to ease of

1  
2 access (non-prescription, no health care visit required, relatively inexpensive or available free of  
3  
4 cost) (13). Data on IUC use in Canada is limited because national surveys had not included  
5  
6 questions about this method.  
7

8  
9 In a recent qualitative study, Canadian health care providers cited cost as the primary barrier to  
10  
11 contraception access nationwide (14). In the province of Quebec, where contraception is  
12  
13 subsidized, residents report the lowest proportion of unmet contraceptive needs compared with  
14  
15 other provinces (15). Low income and immigrant status are also associated with non-use of  
16  
17 contraceptives (16,17). Despite evidence of financial barriers to contraception access (18), no  
18  
19 studies have examined how income might impact choice of contraceptive method among young  
20  
21 Canadian females. In this study, we investigate the association between household income and  
22  
23 contraceptive method using a nationally-representative survey sample of sexually active  
24  
25 Canadian females aged 15–24.  
26  
27  
28  
29  
30

### 31 **Methods**

32  
33 **Data source, design and study population:** This cross-sectional study used public use  
34  
35 microdata files from two cycles (2009–2010 and 2013–2014) of the Canadian Community  
36  
37 Health Survey (CCHS) (19). The CCHS collects information related to health care utilization,  
38  
39 health status and determinants of health in Canada. The survey sample is derived from a  
40  
41 multistage stratified cluster random sampling design. Further details of CCHS sampling methods  
42  
43 are available from Statistics Canada (19,20). Ethics approval for using publicly available CCHS  
44  
45 data is covered by University of British Columbia policies (21) and the Tri-Council Policy  
46  
47 Statement (22).  
48  
49  
50

51  
52 **Analytic sample:** The sample was drawn from CCHS respondents who were asked about  
53  
54 contraceptives, which included persons aged 15–24. We considered those “at risk” of unintended  
55  
56 pregnancy to be females who were ever sexually active, were not currently pregnant, did not  
57  
58  
59  
60

1 have a hysterectomy, and who responded “agree” or “strongly agree” to the statement: “It is  
2 important to me to avoid getting pregnant right now.” Those with invalid responses (“don’t  
3 know, refusal, not applicable, not stated”) were coded as missing. Records with missing  
4 covariates (6.5%) were excluded. The primary analysis was conducted using complete cases.  
5  
6 Inclusion/exclusion criteria and sample sizes are shown in Figure 1.  
7  
8  
9  
10  
11  
12

13  
14 Non-users of contraception were defined as those who responded “no” to the question: “In the  
15 past 12 months, did you and your partner usually use birth control?” For contraceptive users, we  
16 determined each respondent’s method of contraception based on their response to the question:  
17 “What is your usual form of birth control?” Respondents could select one or more “usual”  
18 method: “the pill, injections, condoms, diaphragm, spermicide or other.” Of note, intrauterine  
19 contraceptives were not offered as a possible response and are therefore excluded from this  
20 analysis. Respondents who used the contraceptive patch or ring, IUCs, calendar methods or  
21 withdrawal would be included in the “other” group. Outcome variables were: the use of (1) any  
22 OCs, (2) injectable contraceptives (depot medroxyprogesterone acetate - DMPA), (3) non-  
23 prescription methods (condoms only, condoms and spermicide, or spermicide only) or (4) dual  
24 method (condoms plus OCs or DMPA). We refer to (3) as “condoms only” method, although this  
25 includes <0.2% of respondents who used spermicide without condoms or condoms and  
26 spermicide. As these outcomes were not mutually exclusive, we considered each outcome  
27 independently. Our exposure variable was household income greater than \$80,000 per year  
28 (yes/no), derived from the 5-level household income variable provided in the CCHS datasets.  
29  
30 The cut-point for high versus low income was based on the estimated median family income in  
31 Canada for two-parent families with children in 2010 (\$78,800) (23).  
32  
33  
34  
35  
36  
37  
38  
39  
40  
41  
42  
43  
44  
45  
46  
47  
48  
49  
50  
51  
52

53  
54 **Statistical analysis:** We examined the prevalence of each contraceptive method according to  
55 sociodemographic characteristics. We used survey weights provided with the CCHS public use  
56  
57  
58  
59  
60

1 data (19,20) to account for the complex survey design. These enable accurate weighted point  
2 estimates but conservative variance estimates compared with cluster and primary sampling units  
3 or bootstrap weights. Bivariate associations between each covariate and contraceptive method  
4 were assessed using a modified F-test (with Thomas-Rao modification) (24).  
5  
6  
7  
8  
9

10 We used log binomial regression to estimate risk ratios assessing the association between  
11 household income and the prevalence of each contraceptive method. For each contraceptive type,  
12 we estimated crude and adjusted risk ratios (RRs). The latter adjusted for all potential  
13 confounders identified on *a priori* grounds using causal diagrams: age, self-identified  
14 race/ethnicity, highest level of education in the household, northern resident (Northwest  
15 Territories, Yukon or Nunavut), student, married, recent immigrant (1,3,8,9,11,12,14,18,25). We  
16 conducted analyses using SAS 9.4 (26) and R-3.5.1 (27). All analyses applied sampling weights  
17 to achieve nationally-representative estimates (19). Because we pooled two CCHS survey cycles,  
18 weights were divided by two to obtain a representative weighted population across both survey  
19 cycles.  
20  
21  
22  
23  
24  
25  
26  
27  
28  
29  
30  
31  
32  
33

34  
35 **Sensitivity analysis:** We explored whether our results were robust to different definitions of  
36 household income by fitting additional models: first, with the original 5-level household income  
37 variable obtained from the CCHS and, second, adjusted for household size. To examine whether  
38 results may differ in Quebec due to publicly-funded drug benefits (1), we estimated risk ratios  
39 separately for Quebec and compared with all other provinces excluding Quebec. Finally, we  
40 examined the potential impact of missing data in the covariates using multiple imputation with  
41 chained equations (28) to impute missing covariates for 20 datasets using the “mice” package in  
42 R (29). All possible covariates (with an absolute correlation with the response/imputed variable  
43  $>0.1$ ) were considered as predictors for imputation. Survey-weighted logistic regression models  
44 were repeated among imputed datasets to obtain pooled effect estimates.  
45  
46  
47  
48  
49  
50  
51  
52  
53  
54  
55  
56  
57  
58  
59  
60

## Results

Among all female survey respondents aged 15–24 (n=15,290, representing a population of N=2,137,242), 62% reported being sexually active and 48% were considered “at risk” for unintended pregnancy. Sexual activity differed by age group: 82% of respondents aged 20–24 had ever been sexually active, compared to 26% (15-17 years) and 63% (18–19 years) of younger respondents. Among those who were sexually active, 92% were trying to avoid a pregnancy. Contraceptive non-use was reported by 14% of respondents. By province, rates of non-use were lowest in Quebec (9.2%) and highest in the northern territories (19.4%), compared to the rest of Canada (15%). Oral contraceptives were the most popular method (59.2%), followed by condoms (47.6%), “other” methods 7.7%) and injectable DMPA (2.5%) (Table 1). Over one-third (36.5%) of respondents used more than one method, typically condoms with OCs or DMPA (29.0%).

Table 2 shows the number of survey respondents, corresponding population estimates and weighted prevalence estimates for each contraceptive method, according to sociodemographic characteristics. The lower income group reported less OC use (53.3%, versus 69.0%), while the inverse is seen for DMPA (3.0% versus 1.5%) and condoms only (18.9% versus 13.3%).

Although DMPA use was low overall, it was slightly higher in the two lowest educational attainment groups (4.6% and 5.0%). Oral contraceptives were more prevalent among white females (63.2%) compared with those who identified as a visible minority (43.3%), but demonstrated no difference by marital status. Patterns of contraceptive use were different in the northern territories compared to the rest of Canada. Specifically, northern residents reported lower OC use, and higher condom-only and DMPA use, compared to non-northern residents.

Table 3 presents unadjusted and adjusted RRs for all outcomes, comparing prevalent method-specific use for lower versus higher household income categories. In adjusted models, lower

1 household income was associated with decreased OC (RR=0.85, 95% CI 0.80–0.91) and dual-  
2 method use (RR=0.81, 95% CI 0.71–0.91, and increased DMPA (RR=1.7, 95% CI 0.98–2.9) and  
3 condom-only use (RR=1.4, 95% CI 1.1–1.7), compared to the higher household income group.  
4  
5  
6 Adjustment for confounding variables attenuated associations for all outcomes. In models for  
7 OCs and DMPA, adjusting for household education level had the strongest impact on  
8 associations. By contrast, estimates for condom-only use were attenuated after adjusting for  
9 marital status, ethnicity and immigration status.  
10  
11  
12  
13  
14  
15  
16  
17

18 **Sensitivity analyses:** We estimated the association of low versus high household income on  
19 contraceptive outcomes with imputed data for missing covariates (supplemental S1), and the  
20 results were similar to our primary analyses for all outcomes (Table 3). Using a household size-  
21 adjusted income variable (supplemental S2) yielded effect estimates with a consistent trend  
22 across income categories for all outcomes. Stratifying by the province of Quebec also yielded  
23 similar results for all outcomes (supplemental S3), with the exception of lower prevalence of  
24 non-use.  
25  
26  
27  
28  
29  
30  
31  
32  
33  
34

### 35 **Interpretation**

36 Using a nationally-representative survey sample, we found that lower household income was  
37 associated with lower usage of effective contraception methods, specifically OCs. Those with  
38 lower household income reported a 15% decrease in OC use and a 19% decrease in dual-method  
39 use (condoms plus OCs or DMPA) compared with higher-income respondents. Conversely,  
40 those with lower household income reported a 70% higher use of DMPA and a 36% higher use  
41 of condoms only compared with the higher-income group. These findings are important as there  
42 is a paucity of recent nationally-representative data on contraceptive patterns, as well as limited  
43 information about how household income may be related to choice of contraceptive methods  
44 among youth at risk for unintended pregnancy in Canada (3). Similar to findings from previous  
45  
46  
47  
48  
49  
50  
51  
52  
53  
54  
55  
56  
57  
58  
59  
60



1 Canadian studies, OCs and condoms were the predominant methods of contraception (1,12,18),  
2 and the highest prevalence of OCs use was amongst the youngest age group (15–17 years)  
3  
4 (1,18,30). We also note that the association with income differed for OCs compared to DMPA or  
5  
6 condoms, in unadjusted analyses and after controlling for confounders. This trend was consistent  
7  
8  
9  
10  
11 in models using a 5-level household size-adjusted income variable (supplemental S2).  
12

13  
14 Our study is novel in reporting a significant association with higher household income and an  
15  
16 increase in both OC and dual-method use, after adjusting for other risk factors, in a  
17  
18 representative sample of young Canadian females at risk of unintended pregnancy. While  
19  
20 previous Canadian studies have identified an increase in OC use by higher income status (18,30),  
21  
22 these analyses did not focus on income as the exposure of interest. Our findings suggest young  
23  
24 females from higher-income households may be able to access a broader range of effective  
25  
26 contraceptive methods, perhaps because cost has been reduced or eliminated as a barrier (14).  
27  
28 Higher-income families may also have prescription drug benefits to subsidize costs of  
29  
30 contraceptives. Further, young females from higher-income households were also more likely to  
31  
32 use multiple contraceptive methods, which would provide greater protection against unintended  
33  
34 pregnancies than OCs alone, while also reducing the risk of sexually transmitted infections.  
35  
36  
37  
38  
39

40 Although DMPA use is relatively low in Canada, our study is the first to report increased use of  
41  
42 DMPA among low-income female youth across Canada, with even higher use in the northern  
43  
44 territories. This could be due to provider preference and counselling for this population or patient  
45  
46 preferences, though we could not examine reasons or preferences in this study. In the United  
47  
48 States, DMPA use is similarly higher among vulnerable populations, including indigenous (31),  
49  
50 racial or ethnic minorities (32) and those with low income (33,34). While DMPA provides  
51  
52 effective contraception and is preferred by some, it has a controversial history, including  
53  
54 targeted marketing and provision to vulnerable groups that may indicate reproductive coercion  
55  
56  
57  
58  
59  
60

1  
2 (35–38). Further, side effects of bone density loss and weight gain (39,40) may be particularly  
3  
4 important for youth, as well as recent research linking DMPA and elevated risk of acquisition of  
5  
6 HIV (41). Therefore, our finding of higher use among low-income youth and youth in the  
7  
8 north warrant further examination in studies of provider preferences and patient decision-making  
9  
10 to elucidate reasons for higher injectables use in these Canadian populations.  
11  
12

13  
14 Our findings signal a need for further research aimed at identifying and eliminating barriers to  
15  
16 accessing safe, effective contraception in Canada (42). Policies and educational initiatives  
17  
18 relating to family planning should consider the unique reproductive needs of young females—  
19  
20 especially those within vulnerable populations, who are at greatest risk of unintended pregnancy.  
21  
22

### 23 **Limitations**

24  
25 Our results are based on self-report survey data and could be misclassified, which would  
26  
27 underestimate our measures of association. We could not include the 2011–12 CCHS cycle in  
28  
29 this study as contraception questions were only asked in one province (Ontario) and two  
30  
31 territories (Northwest Territories and Nunavut), which would limit the generalizability of our  
32  
33 results. Unfortunately, these CCHS cycles did not include questions about IUCs, which  
34  
35 prevented us from extending our analyses to these long-acting, highly effective contraceptive  
36  
37 methods. While newer CCHS cycles (from 2015) do ask about IUCs, questions relating to  
38  
39 pregnancy intention have been eliminated. Thus, new CCHS surveys cannot directly identify  
40  
41 people with a need for contraception, those at risk of unintended pregnancy. As this group forms  
42  
43 the denominator to assess contraception use, it is no longer possible in Canada to use the CCHS  
44  
45 to determine the unmet need for contraception, nor the rates of methods used among those with a  
46  
47 need for contraception. Because the CCHS only asks those aged 18 or older about sexual  
48  
49 orientation, our sample may include a small number of homosexual females not at risk of  
50  
51 unintended pregnancy; however, others report <2% of all CCHS respondents identified as  
52  
53  
54  
55  
56  
57  
58  
59  
60

1  
2 homosexual (43). We used household income as a proxy for an individual's ability to pay for  
3  
4 contraceptives, and this may not perfectly equate to individual financial status or could be a  
5  
6 marker for other unmeasured confounders. Finally, by nature of the CCHS's cross-sectional  
7  
8 design, associations between income and contraceptive use cannot be interpreted causally.  
9

## 10 11 **Conclusions**

12  
13 In a nationally-representative sample of young Canadian females who are at risk for unintended  
14  
15 pregnancy, we found that lower household income was associated with decreased use of OCs  
16  
17 and increased reliance on injectable contraceptives and condoms. Our results are consistent with  
18  
19 other recent findings that show substantial variations in contraceptive use within Canada (3),  
20  
21 with lower use of more effective contraceptive methods among vulnerable groups. Collectively,  
22  
23 these findings suggest that subsidizing or eliminating costs for contraceptives, as called for in a  
24  
25 recent position statement by the Canadian Pediatric Society (44), could promote equitable access  
26  
27 to more effective methods of birth control among low-income youth who are at risk of  
28  
29 unintended pregnancy.  
30  
31  
32  
33  
34  
35  
36  
37  
38  
39  
40  
41  
42  
43  
44  
45  
46  
47  
48  
49  
50  
51  
52  
53  
54  
55  
56  
57  
58  
59  
60

## References

1. Black A, Yang Q, Wen SW, Lalonde AB, Guilbert E, Fisher W. Contraceptive Use Among Canadian Women of Reproductive Age: Results of a National Survey. *J Obstet Gynaecol Canada*. 2009;31(7):627–40.
2. Canning D, Schultz TP. The economic consequences of reproductive health and family planning. *Lancet*. 2012;380(9837):165–71.
3. Black A, Co-chair OON. Canadian Contraception Consensus (Part 1 of 4). *J Obstet Gynaecol Canada*. 2015;37(10):S1–28.
4. Black AY, Guilbert E, Hassan F, Chatziheofilou I, Lowin J, Jeddi M, et al. The Cost of Unintended Pregnancies in Canada: Estimating Direct Cost, Role of Imperfect Adherence, and the Potential Impact of Increased Use of Long-Acting Reversible Contraceptives. *J Obstet Gynaecol Canada*. 2015;37(12):1086–97.
5. Oulman E, Kim THM, Yunis K, Tamim H. Prevalence and predictors of unintended pregnancy among women: An analysis of the Canadian Maternity Experiences Survey. *BMC Pregnancy Childbirth*. 2015;15(1):1–8.
6. Finer LB, Zolna MR. Declines in Unintended Pregnancy in the United States, 2008–2011. *N Engl J Med*. 2016;374(9):843–52.
7. Parks C, Peipert JF. Eliminating health disparities in unintended pregnancy with long-acting reversible contraception (LARC) Presented in part at the 2013 annual meeting of the American Gynecological and Obstetrical Society. *Am J Obstet Gynecol*. 2016;214(6):681–8.
8. Metcalfe A, Talavlikar R, Du Prey B, Tough SC. Exploring the relationship between socioeconomic factors, method of contraception and unintended pregnancy. *Reprod Health*. 2016;13(1):1–8.
9. Dhalla S, Poole G. Determinants of Condom Use : Results of the Canadian Community Health Survey 3.1. *Can J Public Heal*. 2009;100(4):299–303.
10. Rotermann M, McKay A. Condom use at last sexual intercourse among unmarried, not living common-law 20- to 34-year-old Canadian young adults. *Can J Hum Sex*. 2009;18(3):75–87.
11. Hall K, Steinberg J, Cwiak C, Allen R, Marcus S. Contraception and Mental health: A commentary on the evidence and principles for practice. *Am J Obstet Gynecol*. 2015;2012(6):740–6.
12. Norman WV, Nuernberger K, Leung V, Soon J, Dunn S. Age-related variations in contraceptive method use among Canadian females aged 15-24 years: data from the 2009-2010 Canadian community health survey. *Contraception*. 2013 Sep 1;88(3):451.
13. Motluk A. Birth control often not covered by Canadian insurers. *CMAJ*. 2016;188(14):1001–2.
14. Hulme J, Dunn S, Guilbert E, Soon J, Norman W. Barriers and facilitators to family planning access in Canada. *Healthc Policy*. 2015;10(3):48–63.
15. Norman WV V, Leung V, Nuernberger K, Dunn S, Soon J. Sexually active youth in

- 1  
2  
3  
4  
5  
6  
7  
8  
9  
10  
11  
12  
13  
14  
15  
16  
17  
18  
19  
20  
21  
22  
23  
24  
25  
26  
27  
28  
29  
30  
31  
32  
33  
34  
35  
36  
37  
38  
39  
40  
41  
42  
43  
44  
45  
46  
47  
48  
49  
50  
51  
52  
53  
54  
55  
56  
57  
58  
59  
60
- Canada: regional variations in pregnancy risk, from the 2009-2010 Canadian community health survey. *Contraception*. 2013 Sep 1;88(3):451.
16. Dunn S, Xiong AQ, Nuernberger K, Norman W V. Non-use of Contraception by Canadian Youth Aged 15 to 24: Findings From the 2009–2010 Canadian Community Health Survey. *J Obstet Gynaecol Canada*. 2018;1–9.
  17. Aptekman M, Rashid M, Wright V, Dunn S. Unmet contraceptive needs among refugees: Crossroads clinic experience. *Can Fam Physician*. 2014;60(12):e613–9.
  18. Rotermann M, Dunn S, Black A. Oral contraceptive use among women aged 15 to 49: Results from the canadian health measures survey. *Heal Reports*. 2015;26(10):21–8.
  19. Statistics Canada. Canadian Community Health Survey - 2014 and 2013-2014 CCHS Microdata File User Guide. Government of Canada; 2015.
  20. Statistics Canada. Canadian Community Health Survey - 2010 and 2009-2010 CCHS Microdata File User Guide. Government of Canada; 2011.
  21. University of British Columbia B of G. Policy # 89: Research Involving Human Participants. Vancouver, BC: University of British Columbia; 2012.
  22. Government of Canada IAP on RE. Tri-Council Policy Statement: Ethical Conduct for Research Involving Humans [Internet]. 2016 [cited 2018 Sep 1]. Available from: <http://www.pre.ethics.gc.ca/eng/policy-politique/initiatives/tcps2-eptc2/chapter2-chapitre2/>
  23. Statistics Canada. Income of Canadians, 2010. *The Daily*. Ottawa, Canada; 2012.
  24. Thomas DR, Rao JN. Small-sample comparisons of level and power for simple goodness-of-fit statistics under cluster sampling. *J Am Stat Assoc*. 1987;82(398):630–6.
  25. Martin TC. Women’s Education and Fertility: Results from 26 Demographic and Health Surveys. *Stud Fam Plann*. 1995;26(4):187.
  26. SAS Institute. SAS software. Cary, NC, USA: SAS Institute;
  27. R Core Team. R: a language and environment for statistical computing. Vienna, Austria: R Foundation for Statistical Computing; 2018.
  28. Sterne JAC, White IR, Carlin JB, Spratt M, Royston P, Kenward MG, et al. Multiple imputation for missing data in epidemiological and clinical research: Potential and pitfalls. *BMJ*. 2009;339(7713):157–60.
  29. Buuren S van, Groothuis-Oudshoorn K. **mice** : Multivariate Imputation by Chained Equations in R. *J Stat Softw*. 2011;45(3).
  30. Maginley KS. Hormonal contraceptive use in Canada: levels, trends, and determinants among reproductive-aged women in british colombia. 2017;(April).
  31. Urban Indian Health Institute. Reproductive Health of Urban American Indian and Alaska Native Women: Examining Unintended Pregnancy, Contraception, Sexual History and Behavior, and Non-Voluntary Sexual Intercourse. Seattle Indian Health Board. Seattle; 2010.
  32. Dehlendorf C, Foster DG, Bocanegra HT de, Brindis C, Bradsberry M, Darney P. Race,

- 1  
2 Ethnicity and Differences in Contraception Among Low- Income Women: Methods  
3 Received by Family PACT Clients, California, 2001–2007. *Perspect Sex Reprod Health.*  
4 2011;43(3):181–7.  
5
- 6 33. Dehlendorf C, Rodriguez MI, Levy K, Borrero S, Steinauer J. Disparities in family  
7 planning. *Am J Obstet Gynecol.* 2010;202(3):214–20.  
8
- 9 34. Ayoola AB, Zandee GL, Johnson E, Pennings K. Contraceptive use among low-income  
10 women living in medically underserved neighborhoods. *JOGNN - J Obstet Gynecol*  
11 *Neonatal Nurs.* 2014;43(4):455–64.  
12
- 13 35. Hawaleshka D. A shot in the dark? *Macleans.* 2005;  
14
- 15 36. Shea L. Reflections on Depo Provera : Contributions to Improving Drug Regulation in  
16 Canada. *Women Heal Prot.* 2007;34(6):1–24.  
17
- 18 37. Morgan J. *Depo-Provera and the Regulation of Indigenous Women’s Reproduction.*  
19 *Simon Fraser University;* 2007.  
20
- 21 38. Volscho TW. Racism and disparities in women’s use of the depo-provera injection in the  
22 contemporary USA. *Crit Sociol.* 2011;37(5):673–88.  
23
- 24 39. Dianat S, Fox E, Ahrens KA, Upadhyay UD, Zlidar VM, Gallo MF, et al. Side Effects and  
25 Health Benefits of Depot Medroxyprogesterone Acetate: A Systematic Review. *Obstet*  
26 *Gynecol.* 2019;133(2):332–41.  
27
- 28 40. Black A, Guilbert E, Costescu D, Dunn S, Fisher W, Kives S, et al. Canadian  
29 Contraception Consensus (Part 3 of 4): Chapter 8 - Progestin-Only Contraception. *J*  
30 *Obstet Gynaecol Canada.* 2016;38(3):279–300.  
31
- 32 41. Polis CB, Curtis KM, Hannaford PC, Phillips SJ, Chipato T, Kiarie JN, et al. An updated  
33 systematic review of epidemiological evidence on hormonal contraceptive methods and  
34 HIV acquisition in women. *Aids.* 2016;30(17):2665–83.  
35
- 36 42. Mitton C, Dionne F, Masucci L, Wong S, Law S. Innovations in health service  
37 organization and delivery in northern rural and remote regions: a review of the literature.  
38 *Int J Circumpolar Health.* 2011 Dec 18;70(5).  
39
- 40 43. Pakula B. *Sexual identity, minority stress, and the mental health of lesbian, gay, isexual,*  
41 *and heterosexual Canadians.* University of British Columbia; 2017.  
42
- 43 44. Di Meglio G, Yorke E. Universal access to no-cost contraception for youth in Canada  
44 (Position statement). *Paediatr Child Health.* 2019;24(3):160–4.  
45  
46  
47  
48  
49  
50  
51  
52  
53  
54  
55  
56  
57  
58  
59  
60

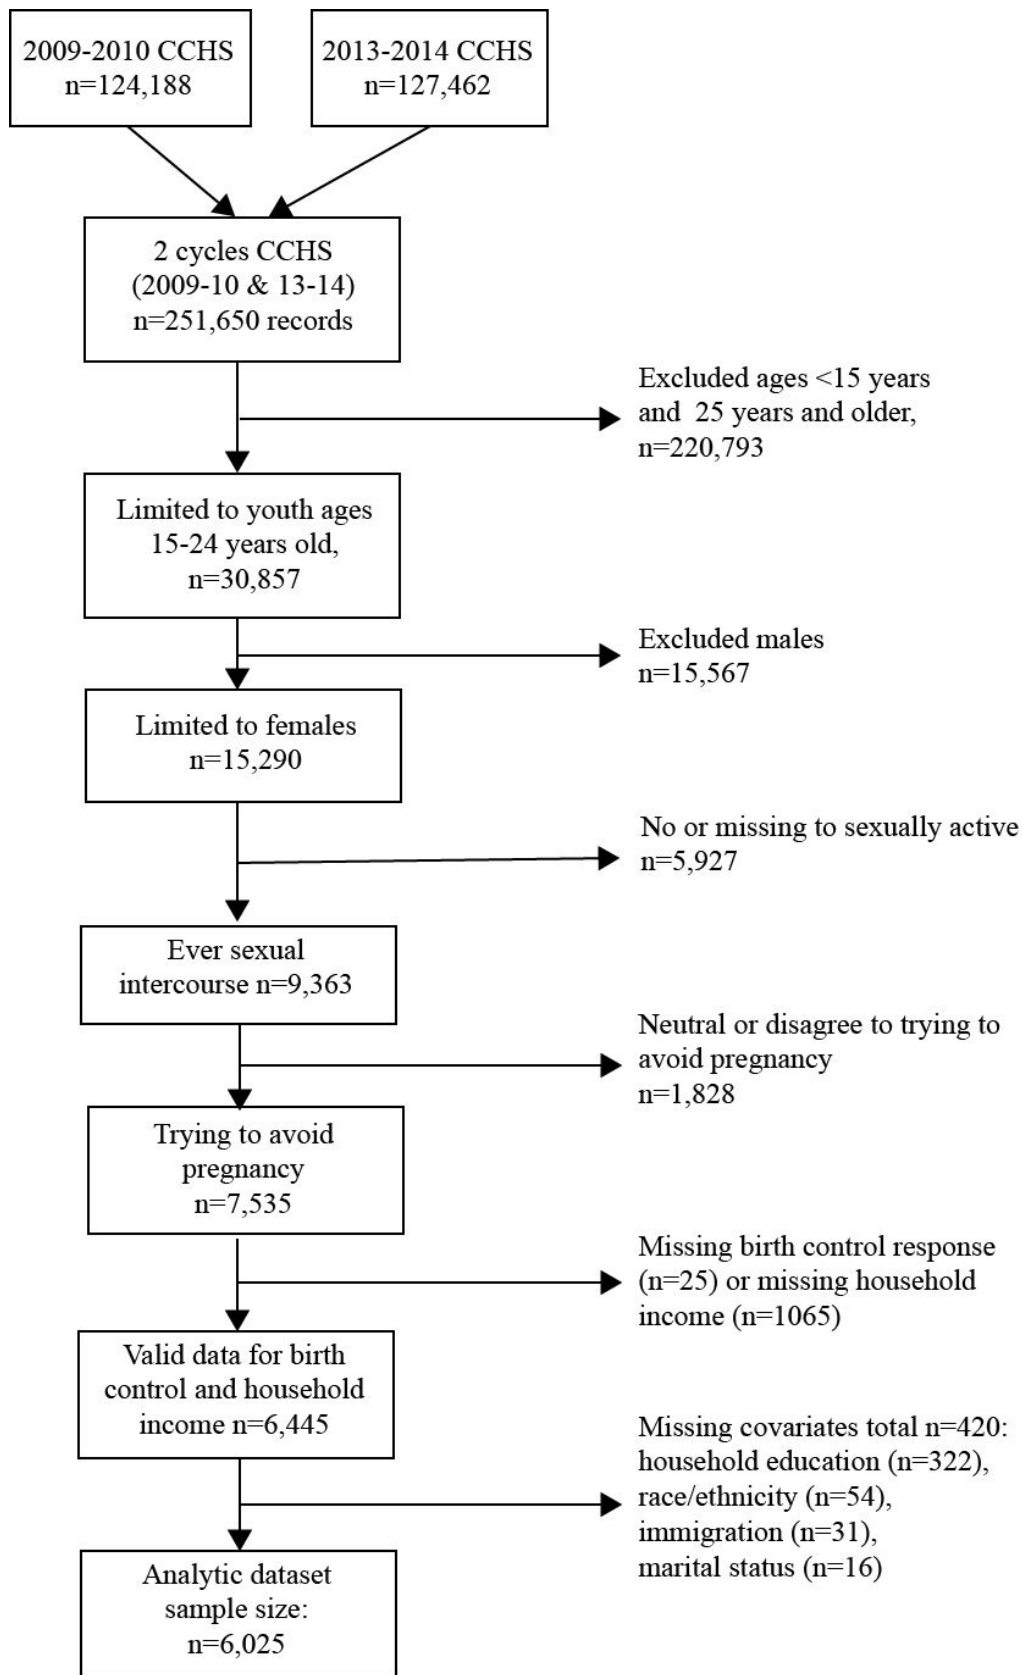

| <i>Usual contraceptive methods</i>                                 | <i>Total= 6,025<br/>n</i> | <i>%<sup>1</sup> (95% CI)<sup>2</sup></i> |
|--------------------------------------------------------------------|---------------------------|-------------------------------------------|
| <i>Survey responses<sup>3</sup></i>                                |                           |                                           |
| Oral contraceptives (OC) <sup>4</sup>                              | 3,634                     | 59.2 (57.2, 61.2)                         |
| Condom                                                             | 2,953                     | 47.6 (45.6, 49.6)                         |
| Other                                                              | 471                       | 7.7 (6.6, 8.8)                            |
| Injectable contraceptives (DMPA) <sup>5</sup>                      | 190                       | 2.5 (1.9, 3.0)                            |
| Diaphragm                                                          | 72                        | 1.0 (0.7, 1.4)                            |
| Non-use (no contraceptive method)                                  | 815                       | 13.6 (12.3, 15.0)                         |
| <i>Derived results</i>                                             |                           |                                           |
| Condom and/or spermicide (no other methods indicated) <sup>5</sup> | 902                       | 16.8 (15.3, 18.4)                         |
| ≥2 contraceptive methods reported                                  | 2,105                     | 36.5 (34.5, 38.6)                         |
| Condom+: Condom plus OCs or DMPA <sup>5</sup>                      | 1,927                     | 29.0 (27.3, 30.8)                         |

<sup>1</sup> Population-weighted prevalence estimates (survey weighted) for female youth, ages 15–24 in Canada

<sup>2</sup> 95% confidence intervals

<sup>3</sup> Respondents could indicate more than one method to the question: “What is your usual method of birth control?” (results for spermicide only not shown due to low numbers)

<sup>4</sup> Primary outcome

<sup>5</sup> Secondary outcomes: injectable contraceptives and condom/spermicide



| <i>Covariates</i>                                       | <i>Total survey (N=6,025) n</i> | <i>Population estimates (N= 826,711) n (%)</i> | <i>Oral Contraceptives % (95% CI)</i> | <i>Injections % (95% CI)</i> | <i>Condoms only<sup>1</sup> % (95% CI)</i> | <i>Non-users % (95% CI)</i> |
|---------------------------------------------------------|---------------------------------|------------------------------------------------|---------------------------------------|------------------------------|--------------------------------------------|-----------------------------|
| <b>Household income</b>                                 |                                 |                                                |                                       |                              |                                            |                             |
| <\$80,000/year                                          | 3,689                           | 516,241 (62.4)                                 | 53.3 (50.7, 55.9)                     | 3.0 (2.2, 3.8)               | 18.9 (16.9, 21.0)                          | 15.5 (13.7, 17.3)           |
| ≥ \$80,000/year                                         | 2,336                           | 310,470 (37.6)                                 | 69.0 (66.0, 71.9)                     | 1.5 (0.8, 2.2)               | 13.3 (11.0, 15.6)                          | 10.5 (8.5, 12.5)            |
| <b>Age</b>                                              |                                 |                                                |                                       |                              |                                            |                             |
| 15 to 17 years                                          | 1,045                           | 95,467 (11.5)                                  | 63.7 (59.7, 67.8)                     | 2.4 (1.3, 3.6)               | 15.2 (12.2, 18.3)                          | 16.3 (13.3, 19.4)           |
| 18 to 19 years                                          | 1,325                           | 157,515 (19.1)                                 | 59.2 (54.8, 63.5)                     | 2.6 (1.4, 3.7)               | 17.8 (14.1, 21.5)                          | 14.9 (11.6, 18.1)           |
| 20 to 24 years                                          | 3,655                           | 573,729 (69.4)                                 | 58.4 (55.9, 60.9)                     | 2.4 (1.7, 3.1)               | 16.8 (14.9, 18.7)                          | 12.8 (11.2, 14.5)           |
| <b>Race or ethnicity</b>                                |                                 |                                                |                                       |                              |                                            |                             |
| white                                                   | 4,910                           | 660,166 (79.9)                                 | 63.2 (61.0, 65.3)                     | 2.3 (1.7, 2.9)               | 14.9 (13.2, 16.6)                          | 11.3 (10.0, 12.7)           |
| visible minority                                        | 1,115                           | 166,545 (20.1)                                 | 43.3 (38.5, 48.1)                     | 3.2 (1.8, 4.6)               | 24.3 (20.5, 28.2)                          | 22.6 (18.7, 26.5)           |
| <b>Current student</b>                                  |                                 |                                                |                                       |                              |                                            |                             |
| no                                                      | 2,618                           | 369,334 (44.7)                                 | 52.5 (49.4, 55.7)                     | 2.8 (1.9, 3.7)               | 18.1 (15.5, 20.6)                          | 17.1 (14.8, 19.5)           |
| yes                                                     | 3,407                           | 457,377 (55.3)                                 | 64.5 (62.1, 67.0)                     | 2.2 (1.5, 2.9)               | 15.8 (13.9, 17.7)                          | 10.8 (9.2, 12.3)            |
| <b>Married or common-law</b>                            |                                 |                                                |                                       |                              |                                            |                             |
| no                                                      | 5,063                           | 676,199 (81.8)                                 | 59.9 (57.8, 62.1)                     | 2.4 (1.8, 3.0)               | 17.7 (15.9, 19.5)                          | 13.2 (11.8, 14.7)           |
| yes                                                     | 962                             | 150,513 (18.2)                                 | 55.9 (50.9, 60.9)                     | 2.8 (1.4, 4.2)               | 13.0 (10.0, 15.9)                          | 15.3 (11.7, 19.0)           |
| <b>Recent immigrant<sup>2</sup></b>                     |                                 |                                                |                                       |                              |                                            |                             |
| no                                                      | 5,871                           | 787,812 (95.3)                                 | 60.2 (58.2, 62.2)                     | 2.5 (1.9, 3.0)               | 15.8 (14.3, 17.4)                          | 13.5 (12.1, 14.9)           |
| yes                                                     | 154                             | 38,899 (4.7)                                   | 37.9 (27.3, 48.5)                     | <2.0                         | 37.0 (27.4, 46.7)                          | 16.5 (10.1, 22.9)           |
| <b>Highest level education - Household</b>              |                                 |                                                |                                       |                              |                                            |                             |
| < secondary                                             | 284                             | 29,935 (3.6)                                   | 32.9 (23.8, 42.1)                     | 4.6 (1.8, 7.5)               | 16.6 (4.8, 28.4)                           | 27.5 (19.4, 35.7)           |
| secondary grad                                          | 730                             | 89,807 (10.9)                                  | 46.0 (40.1, 51.9)                     | 5.0 (2.6, 7.4)               | 20.7 (15.7, 25.7)                          | 19.6 (15.4, 23.8)           |
| some post-sec                                           | 502                             | 70,826 (8.6)                                   | 55.0 (47.7, 62.3)                     | 2.3 (0.3, 4.3)               | 16.4 (11.5, 21.3)                          | 17.3 (11.9, 22.6)           |
| post-sec grad                                           | 4,509                           | 636,143 (76.9)                                 | 62.7 (60.5, 65.0)                     | 2.0 (1.4, 2.6)               | 16.3 (14.6, 18.1)                          | 11.7 (10.2, 13.2)           |
| <b>Consulted a doctor or nurse in past 12 months</b>    |                                 |                                                |                                       |                              |                                            |                             |
| no                                                      | 744                             | 104,844 (12.7)                                 | 42.4 (36.3, 48.5)                     | 1.5 (0.4, 2.6)               | 26.8 (21.9, 31.8)                          | 22.9 (17.9, 27.8)           |
| yes                                                     | 5,278                           | 721,490 (87.3)                                 | 61.6 (59.5, 63.7)                     | 2.6 (2.0, 3.2)               | 15.4 (13.7, 17.0)                          | 12.3 (10.9, 13.6)           |
| <b>Has family doctor</b>                                |                                 |                                                |                                       |                              |                                            |                             |
| no                                                      | 1,132                           | 168,906 (20.5)                                 | 48.1 (43.2, 53.0)                     | 2.0 (0.8, 3.3)               | 21.0 (17.2, 24.8)                          | 18.2 (14.5, 21.9)           |
| yes                                                     | 4,887                           | 656,656 (79.5)                                 | 62.0 (59.9, 64.2)                     | 2.6 (2.0, 3.2)               | 15.7 (14.0, 17.4)                          | 12.5 (11.0, 13.9)           |
| <b>Resident of the northern territories<sup>3</sup></b> |                                 |                                                |                                       |                              |                                            |                             |
| No                                                      | 5,823                           | 823,779 (99.6)                                 | 59.3 (57.3, 61.3)                     | 2.4 (1.9, 3.0)               | 16.8 (15.2, 18.4)                          | 13.6 (12.2, 14.9)           |
| Yes                                                     | 202                             | 2,933 (0.4)                                    | 33.9 (26.3, 41.6)                     | 9.6 (4.2, 15.0)              | 22.5 (15.4, 29.7)                          | 19.4 (12.7, 26.1)           |
| <b>Quebec<sup>4</sup></b>                               |                                 |                                                |                                       |                              |                                            |                             |
| no                                                      | 4,747                           | 619,576 (74.9)                                 | 57.9 (55.6, 60.2)                     | 2.6 (2.0, 3.3)               | 17.2 (15.4, 19.0)                          | 15.1 (13.5, 16.7)           |
| yes                                                     | 1,278                           | 207,135 (25.1)                                 | 63.1 (59.1, 67.1)                     | 1.9 (0.9, 2.9)               | 15.8 (12.8, 18.7)                          | 9.2 (6.8, 11.6)             |

<sup>1</sup> Includes those reporting using only spermicide and/or condoms

<sup>2</sup> Immigrated to Canada within the last 10 years

<sup>3</sup> Province of residence was one of the Yukon, Northwest Territories or Nunavut

<sup>4</sup> Quebec has a publicly funded prescription benefit program and contraceptives are covered for youth who are not under a private drug plan

| <i>Primary outcomes</i> | <i>Crude RR<sup>1</sup> (95% CI<sup>2</sup>)<br/>for low income group</i> | <i>Adjusted RR<sup>3</sup> (95% CI)<br/>for low income group</i> |
|-------------------------|---------------------------------------------------------------------------|------------------------------------------------------------------|
| Oral Contraceptives     | 0.77 (0.72, 0.83)                                                         | 0.85 (0.80, 0.91)                                                |
| Injections (DMPA)       | 1.96 (1.16, 3.32)                                                         | 1.69 (0.98, 2.92)                                                |
| Condoms only            | 1.42 (1.16, 1.74)                                                         | 1.36 (1.11, 1.67)                                                |
| Non-users               | 1.47 (1.17, 1.84)                                                         | 1.19 (0.94, 1.5)                                                 |
| <i>Multiple methods</i> |                                                                           |                                                                  |
| Condom plus OCs or DMPA | 0.67 (0.59, 0.75)                                                         | 0.81 (0.71, 0.91)                                                |

<sup>1</sup> Risk ratio

<sup>2</sup> 95% confidence intervals (CI) using robust standard errors.

<sup>3</sup> Adjusted for: household income, age, race/ethnicity, recent immigrant, student status, marital status, household level of education, northern residence

Supplemental material for: **Differential association of household income with contraceptive methods among female youth: Results from the Canadian Community Health Survey (2009–10 and 2013–14)**

**Supplemental S1 - Multiple imputation results**

Dataset with missing data (for imputation) included 6,445 survey responses. Imputation for 420 missing values (<7% of the full dataset); details of missing data are shown in Figure 1.

Table S1-1. Pooled effect estimates for the odds of contraceptives use based on the effect of lower household income using datasets with missing data imputed, from the Canadian Community Health Survey (2009–2010 and 2013–2014).

| <i>Outcome</i>            | <i>Pooled RR</i> | <i>95% CI</i> |
|---------------------------|------------------|---------------|
| Oral contraceptives       | 0.86             | 0.80, 0.92    |
| Injectable contraceptives | 1.68             | 1.00, 2.83    |
| Condoms only              | 1.33             | 1.09, 1.63    |
| Non-users                 | 1.20             | 0.96, 1.51    |
| Condom plus OCs or DMPA   | 0.83             | 0.74, 0.93    |

## Supplemental S2 - Two alternate definitions of household income

The original 5-level categorical variable for household income from the CCHS was also assessed in bivariate and logistic regression models with the outcomes of interest. Further, we refined the household income variable by adjusting for the number of individuals living in the household using the relevant CCHS categorical variable for household size. Because only categorical data was available for both household income and household size, we first created a continuous variable for household income using the midpoint of the range (except for the highest range, which was assigned as \$100,000). Then, we assigned household size based on the categorical variable from the CCHS (1-person household = 1, ... 5-person household = 5). The adjusted per-person household income was calculated based on commonly used approaches: an “equivalence scale”<sup>1,2</sup> adjustment to account for economies of scale in larger households, which would impact a per-person “adjusted household income”. Adjusted household income in this study was calculated as follows:

$$\text{Adjusted household income} = \text{Household income} / (\text{Household size})^{0.5}$$

Descriptive statistics and prevalence estimates for both household income variables are shown in Table S2-1 below. Adjusted and unadjusted logistic regression model estimated odds ratios using the 5-level categorical household income variable and adjusted household income are shown in Table S2-2.

---

<sup>1</sup> Smeeding TM. Poor People in Rich Nations: The United States in Comparative Perspective. *Ssrn*. 2005;20(1):69–90.

<sup>2</sup> Kochhar R, Cohn D. Fighting Poverty in a Bad Economy, Americans Move in with Relatives. Pew Research Center’s Social & Demographic Trends Project. 2011.

Table S2-1. Descriptive statistics and population prevalence estimates for contraceptive outcomes by household income and adjusted income among female youth, from the Canadian Community Health Survey (2009–2010 and 2013–2014).

| <i>Income variables</i>                     | <i>Survey responses (N=6025)<sup>2</sup></i><br><i>n</i> | <i>Population estimates (N= 826 711)</i><br><i>n (%)</i> | <i>Oral contraceptives</i><br><i>% (95% CI)</i> | <i>Injectable DMPA</i><br><i>% (95% CI)</i> | <i>Condoms<sup>1</sup></i><br><i>% (95% CI)</i> | <i>Non-users</i><br><i>% (95% CI)</i> |
|---------------------------------------------|----------------------------------------------------------|----------------------------------------------------------|-------------------------------------------------|---------------------------------------------|-------------------------------------------------|---------------------------------------|
| Yearly household income <sup>3</sup>        |                                                          |                                                          |                                                 |                                             |                                                 |                                       |
| None or <\$20,000                           | 681                                                      | 94 298 (11.4)                                            | 48.1 (42.2, 53.9)                               | 4.2 (2.4, 6.0)                              | 19.0 (14.6, 23.5)                               | 19.8 (15.4, 24.1)                     |
| \$20,000–\$39,999                           | 1030                                                     | 143 975 (17.4)                                           | 52.2 (47.2, 57.3)                               | 3.0 (1.4, 4.6)                              | 17.5 (14.0, 21.0)                               | 17.7 (14.0, 21.3)                     |
| \$40,000–\$59,999                           | 1047                                                     | 146 608 (17.7)                                           | 54.5 (49.7, 59.4)                               | 3.4 (1.8, 5.1)                              | 18.2 (14.5, 21.8)                               | 13.7 (10.5, 16.9)                     |
| \$60,000–\$79,999                           | 931                                                      | 131 361 (15.9)                                           | 56.9 (51.4, 62.3)                               | 1.7 (0.6, 2.8)                              | 21.2 (16.3, 26.1)                               | 12.0 (8.7, 15.4)                      |
| \$80,000 or more                            | 2336                                                     | 310 470 (37.6)                                           | 69.0 (66.0, 71.9)                               | 1.5 (0.8, 2.2)                              | 13.3 (11.0, 15.6)                               | 10.5 (8.5, 12.5)                      |
| Household size-adjusted income <sup>4</sup> |                                                          |                                                          |                                                 |                                             |                                                 |                                       |
| less than \$20,000 pp <sup>5</sup>          | 1159                                                     | 158 009 (19.1)                                           | 45.9 (41.1, 50.6)                               | 4.3 (2.8, 5.8)                              | 20.0 (16.3, 23.6)                               | 21.0 (17.5, 24.5)                     |
| 20-<40k pp                                  | 1888                                                     | 273 599 (33.1)                                           | 56.7 (53.1, 60.3)                               | 2.3 (1.3, 3.3)                              | 17.7 (15.1, 20.4)                               | 14.0 (11.5, 16.6)                     |
| 40-<60k pp                                  | 2696                                                     | 359 083 (43.4)                                           | 65.7 (62.8, 68.6)                               | 1.7 (1.0, 2.4)                              | 15.5 (13.1, 17.9)                               | 10.4 (8.6, 12.2)                      |
| 60k pp or more                              | 282                                                      | 36 021 (4.4)                                             | 71.4 (63.9, 78.8)                               | 2.9 (0.2, 5.7)                              | 9.1 (5.2, 13.0)                                 | 10.0 (4.2, 15.9)                      |

<sup>1</sup> Includes those reporting usually using only spermicide and/or condoms

<sup>2</sup> N for this analysis, 6 cases excluded due to missing data for household size

<sup>3</sup> Original yearly household income variable from CCHS

<sup>4</sup> Adjusted household income based on household size

<sup>5</sup> pp = per person

Table S2-2. Effect of yearly household income and household size-adjusted income on contraceptives used by female youth (ages 15–24 years), from the Canadian Community Health Survey (2009–10 and 2013–14), adjusted and unadjusted regression models.

| Covariate<br>(main exposure only) | Oral contraceptives                            |                                      | Injectable DPMA      |                         | Condoms only         |                         | Non-users            |                         |
|-----------------------------------|------------------------------------------------|--------------------------------------|----------------------|-------------------------|----------------------|-------------------------|----------------------|-------------------------|
|                                   | Crude<br>RR <sup>1</sup> (95% CI) <sup>2</sup> | Adjusted <sup>3</sup><br>RR (95% CI) | Crude<br>RR (95% CI) | Adjusted<br>RR (95% CI) | Crude<br>RR (95% CI) | Adjusted<br>RR (95% CI) | Crude<br>RR (95% CI) | Adjusted<br>RR (95% CI) |
| <b>Model 1:</b>                   |                                                |                                      |                      |                         |                      |                         |                      |                         |
| Yearly household income           |                                                |                                      |                      |                         |                      |                         |                      |                         |
| ≥ \$80,000                        | baseline                                       | baseline                             | baseline             | baseline                | baseline             | baseline                | baseline             | baseline                |
| \$60,000 – \$79,999               | 0.82 (0.74, 0.92)                              | 0.86 (0.78, 0.96)                    | 1.11 (0.51, 2.44)    | 1.05 (0.46, 2.38)       | 1.59 (1.19, 2.12)    | 1.59 (1.20, 2.10)       | 1.14 (0.81, 1.60)    | 1.03 (0.74, 1.45)       |
| \$40,000 – \$59,999               | 0.79 (0.72, 0.87)                              | 0.86 (0.78, 0.95)                    | 2.23 (1.14, 4.34)    | 1.97 (1.01, 3.81)       | 1.36 (1.05, 1.78)    | 1.32 (1.01, 1.72)       | 1.30 (0.96, 1.76)    | 1.06 (0.78, 1.44)       |
| \$20,000 – \$39,999               | 0.76 (0.68, 0.84)                              | 0.85 (0.76, 0.94)                    | 1.97 (0.99, 3.96)    | 1.74 (0.85, 3.56)       | 1.31 (1.01, 1.71)    | 1.23 (0.93, 1.61)       | 1.68 (1.27, 2.22)    | 1.34 (1.00, 1.81)       |
| None – \$19,999                   | 0.70 (0.61, 0.79)                              | 0.81 (0.72, 0.92)                    | 2.72 (1.45, 5.08)    | 2.23 (1.15, 4.33)       | 1.43 (1.07, 1.91)    | 1.25 (0.91, 1.71)       | 1.88 (1.40, 2.52)    | 1.48 (1.08, 2.02)       |
| <b>Model 2:</b>                   |                                                |                                      |                      |                         |                      |                         |                      |                         |
| Household size-adjusted income    |                                                |                                      |                      |                         |                      |                         |                      |                         |
| ≥ \$60,000 or more                | baseline                                       | baseline                             | baseline             | baseline                | baseline             | baseline                | baseline             | baseline                |
| \$40,000 – \$59,999               | 0.92 (0.82, 1.03)                              | 0.89 (0.80, 1.00)                    | 0.58 (0.21, 1.61)    | 0.58 (0.21, 1.58)       | 1.71 (1.08, 2.70)    | 1.52 (0.95, 2.45)       | 1.03 (0.56, 1.90)    | 1.07 (0.60, 1.92)       |
| \$20,000 – \$39,999               | 0.79 (0.70, 0.90)                              | 0.83 (0.73, 0.94)                    | 0.78 (0.28, 2.21)    | 0.71 (0.25, 1.98)       | 1.95 (1.24, 3.08)    | 1.70 (1.07, 2.71)       | 1.40 (0.76, 2.58)    | 1.26 (0.69, 2.28)       |
| none – \$19,999                   | 0.64 (0.56, 0.74)                              | 0.72 (0.62, 0.83)                    | 1.46 (0.54, 3.97)    | 1.22 (0.45, 3.26)       | 2.20 (1.38, 3.51)    | 1.75 (1.07, 2.85)       | 2.09 (1.14, 3.85)    | 1.70 (0.94, 3.07)       |

<sup>1</sup> Risk ratio

<sup>2</sup> 95% confidence intervals (CI) using robust standard errors.

<sup>3</sup> Adjusted for: household income, age, race/ethnicity, recent immigrant, student, marital status, household level of education, northern residence

### Supplemental S3 – Stratification by Quebec

To examine whether results may differ in Quebec, we ran all analysis stratified by for the province of Quebec only (n=1278 surveys) compared to all other provinces/territories (n=4747 surveys). Table S3-1 presents the prevalence estimates using weighted populations for all contraceptive outcomes when the survey was stratified by Quebec compared with the rest of Canada. Table S3-2 presents results from regression models predicting risk of contraceptive use in stratified groups.

Confidential

Table S3-1. Stratified for Quebec versus rest of Canada: descriptive statistics and population prevalence estimates for contraceptive outcomes by 2-level household income and adjusted income among female youth, from the Canadian Community Health Survey (2009–2010 and 2013–2014).

| <i>Household income</i> | <i>Surveys</i><br>n | <i>Population estimates</i><br>n (%) | <i>Oral contraceptives</i> | <i>Injectable DPMA</i> | <i>Condoms only</i> | <i>Non-users</i>  |
|-------------------------|---------------------|--------------------------------------|----------------------------|------------------------|---------------------|-------------------|
| Quebec Only             | (n=1278)            | (n= 207 135)                         | 63.1 (59.1, 67.1)          | 1.9 (0.9, 2.9)         | 15.8 (12.8, 18.7)   | 9.2 (6.8, 11.6)   |
| Household income        |                     |                                      |                            |                        |                     |                   |
| higher income group     | 440                 | 70 450 (34.0)                        | 79.2 (74.3, 84.1)          | 1.0 (0.0, 2.0)         | 8.8 (5.4, 12.3)     | 5.4 (2.7, 8.1)    |
| lower income group      | 838                 | 136 685 (66.0)                       | 54.8 (49.6, 60.0)          | 2.4 (0.9, 3.8)         | 19.3 (15.2, 23.4)   | 11.2 (7.9, 14.5)  |
| Rest of Canada          | (n=4747)            | (n=619 576)                          | 57.9 (55.6, 60.2)          | 2.6 (2.0, 3.3)         | 17.2 (15.4, 19.0)   | 15.1 (13.5, 16.7) |
| Household income        |                     |                                      |                            |                        |                     |                   |
| higher income group     | 1896                | 240 020 (38.7)                       | 65.9 (62.5, 69.4)          | 1.7 (0.8, 2.6)         | 14.6 (11.9, 17.4)   | 12.0 (9.5, 14.5)  |
| lower income group      | 2851                | 379 556 (61.3)                       | 52.8 (49.7, 55.8)          | 3.2 (2.3, 4.2)         | 18.8 (16.4, 21.2)   | 17.0 (14.9, 19.2) |

Table S3-2. Stratified by Quebec versus rest of Canada: effect of low household income (<80,000\$/year) on contraceptives used by female youth, from the Canadian Community Health Survey (2009–2010 and 2013–2014), adjusted and unadjusted regression models.

| <i>Primary outcomes</i> | <i>Quebec only</i>                                                                        | <i>Adjusted RR<sup>3</sup></i><br><i>(95% CI)</i> | <i>Rest of Canada</i>                                             | <i>Adjusted RR<sup>3</sup> (95% CI)</i> |
|-------------------------|-------------------------------------------------------------------------------------------|---------------------------------------------------|-------------------------------------------------------------------|-----------------------------------------|
|                         | <i>Crude RR<sup>1</sup></i><br><i>(95% CI)<sup>2</sup></i><br><i>for low income group</i> |                                                   | <i>Crude RR</i><br><i>(95% CI)</i><br><i>for low income group</i> |                                         |
| Oral contraceptives     | 0.69 (0.62, 0.77)                                                                         | 0.75 (0.67, 0.84)                                 | 0.8 (0.74, 0.87)                                                  | 0.89 (0.82, 0.96)                       |
| Injections (DMPA)       | 2.38 (0.74, 7.68)                                                                         | 2.20 (0.71, 6.84)                                 | 1.92 (1.07, 3.43)                                                 | 1.61 (0.88, 2.94)                       |
| Condoms only            | 2.18 (1.4, 3.41)                                                                          | 2.12 (1.35, 3.31)                                 | 1.28 (1.02, 1.61)                                                 | 1.23 (0.98, 1.55)                       |
| Non-users               | 2.07 (1.16, 3.69)                                                                         | not estimable <sup>4</sup>                        | 1.42 (1.11, 1.8)                                                  | 1.14 (0.88, 1.47)                       |
| <b>Multiple methods</b> |                                                                                           |                                                   |                                                                   |                                         |
| Condom plus OCs or DMPA | 0.67 (0.52, 0.86)                                                                         | not estimable <sup>4</sup>                        | 0.67 (0.58, 0.77)                                                 | 0.82 (0.71, 0.94)                       |

<sup>1</sup> Risk ratio

<sup>2</sup> 95% confidence intervals (CI) using robust standard errors.

<sup>3</sup> Adjusted for: household income, age, race/ethnicity, recent immigrant, student status, marital status, household level of education, northern residence (rest of Canada group only)

<sup>4</sup> Model was not estimable for income status due to low cell counts for outcome of interest (household income)



## Supplemental S4 – Addendum to Table 2

Table S4-1 Estimated population prevalence (%) for dual-method use (condoms plus OCs or DMPA), by various covariates, from Canadian Community Health Survey (2009–2010 and 2013–2014). Addendum to Table 2.

| <i>Covariates</i>                                       | <i>Multiple method:<br/>Condom + OCs or DMPA<br/>% (95% CI)</i> |
|---------------------------------------------------------|-----------------------------------------------------------------|
| <b>Household income</b>                                 |                                                                 |
| <\$80,000/year                                          | 24.5 (22.3, 26.6)                                               |
| ≥ \$80,000/year                                         | 36.6 (33.7, 39.6)                                               |
| <b>Age</b>                                              |                                                                 |
| 15 to 17 years                                          | 42.8 (38.5, 47.1)                                               |
| 18 to 19 years                                          | 33.0 (29.1, 36.9)                                               |
| 20 to 24 years                                          | 25.7 (23.5, 27.8)                                               |
| <b>Race or ethnicity</b>                                |                                                                 |
| White                                                   | 31.0 (29.0, 33.0)                                               |
| visible minority                                        | 21.2 (17.6, 24.8)                                               |
| <b>Current student</b>                                  |                                                                 |
| no                                                      | 22.6 (20.1, 25.1)                                               |
| yes                                                     | 34.2 (31.8, 36.7)                                               |
| <b>Married or common-law</b>                            |                                                                 |
| no                                                      | 32.0 (30.0, 34.0)                                               |
| yes                                                     | 15.7 (11.8, 19.6)                                               |
| <b>Recent immigrant<sup>1</sup></b>                     |                                                                 |
| No                                                      | 29.5 (27.7, 31.3)                                               |
| Yes                                                     | 18.7 (9.8, 27.7)                                                |
| <b>Highest level education – Household</b>              |                                                                 |
| < secondary                                             | 12.6 (7.2, 18.1)                                                |
| secondary grad                                          | 25.2 (20.1, 30.3)                                               |
| some post-sec                                           | 23.3 (18.0, 28.6)                                               |
| post-sec grad                                           | 31.0 (28.9, 33.0)                                               |
| <b>Consulted a doctor or nurse in past 12 months</b>    |                                                                 |
| No                                                      | 20.7 (15.8, 25.6)                                               |
| Yes                                                     | 30.3 (28.4, 32.2)                                               |
| <b>Has family doctor</b>                                |                                                                 |
| No                                                      | 21.1 (17.6, 24.7)                                               |
| Yes                                                     | 31.0 (29.0, 33.0)                                               |
| <b>Resident of the northern territories<sup>2</sup></b> |                                                                 |
| No                                                      | 29.1 (27.3, 30.8)                                               |
| Yes                                                     | 20.7 (13.9, 27.6)                                               |
| <b>Quebec<sup>3</sup></b>                               |                                                                 |
| no                                                      | 29.4 (27.4, 31.5)                                               |
| yes                                                     | 27.8 (24.2, 31.4)                                               |

<sup>1</sup> Immigrated to Canada within the last 10 years

<sup>2</sup> Province of residence was one of the Yukon, Northwest Territories or Nunavut

<sup>3</sup> Quebec has a publicly-funded prescription benefit program; contraceptives are covered for youth who do not have coverage under a private drug plan

1  
2  
3  
4  
5  
6  
7  
8  
9  
10  
11  
12  
13  
14  
15  
16  
17  
18  
19  
20  
21  
22  
23  
24  
25  
26  
27  
28  
29  
30  
31  
32  
33  
34  
35  
36  
37  
38  
39  
40  
41  
42  
43  
44  
45  
46  
47  
48  
49  
50  
51  
52  
53  
54  
55  
56  
57  
58  
59  
60

Confidential

For submitted manuscript: Nethery et al. "Differential association of household income with contraceptive methods among female youth: Results from the Canadian Community Health Survey (2009-10 and 2013-14)"

STROBE Statement—Checklist of items that should be included in reports of *cross-sectional studies*

|                              | Item No | Recommendation                                                                                                                                                                                    | Page No      |
|------------------------------|---------|---------------------------------------------------------------------------------------------------------------------------------------------------------------------------------------------------|--------------|
| <b>Title and abstract</b>    | 1       | (a) Indicate the study's design with a commonly used term in the title or the abstract                                                                                                            | 3 - abstract |
|                              |         | (b) Provide in the abstract an informative and balanced summary of what was done and what was found                                                                                               | 3 abstract   |
| <b>Introduction</b>          |         |                                                                                                                                                                                                   |              |
| Background/rationale         | 2       | Explain the scientific background and rationale for the investigation being reported                                                                                                              | 4            |
| Objectives                   | 3       | State specific objectives, including any prespecified hypotheses                                                                                                                                  | 5            |
| <b>Methods</b>               |         |                                                                                                                                                                                                   |              |
| Study design                 | 4       | Present key elements of study design early in the paper                                                                                                                                           | 5            |
| Setting                      | 5       | Describe the setting, locations, and relevant dates, including periods of recruitment, exposure, follow-up, and data collection                                                                   | 5-6          |
| Participants                 | 6       | (a) Give the eligibility criteria, and the sources and methods of selection of participants                                                                                                       | 6            |
| Variables                    | 7       | Clearly define all outcomes, exposures, predictors, potential confounders, and effect modifiers. Give diagnostic criteria, if applicable                                                          | 6            |
| Data sources/<br>measurement | 8*      | For each variable of interest, give sources of data and details of methods of assessment (measurement). Describe comparability of assessment methods if there is more than one group              | 5-6          |
| Bias                         | 9       | Describe any efforts to address potential sources of bias                                                                                                                                         | 7            |
| Study size                   | 10      | Explain how the study size was arrived at                                                                                                                                                         | 6            |
| Quantitative variables       | 11      | Explain how quantitative variables were handled in the analyses. If applicable, describe which groupings were chosen and why                                                                      | 6            |
| Statistical methods          | 12      | (a) Describe all statistical methods, including those used to control for confounding                                                                                                             | 6-7          |
|                              |         | (b) Describe any methods used to examine subgroups and interactions                                                                                                                               | 7            |
|                              |         | (c) Explain how missing data were addressed                                                                                                                                                       | 6-7          |
|                              |         | (d) If applicable, describe analytical methods taking account of sampling strategy                                                                                                                | 6-7          |
|                              |         | (e) Describe any sensitivity analyses                                                                                                                                                             | 7            |
| <b>Results</b>               |         |                                                                                                                                                                                                   |              |
| Participants                 | 13*     | (a) Report numbers of individuals at each stage of study—eg numbers potentially eligible, examined for eligibility, confirmed eligible, included in the study, completing follow-up, and analysed | 8            |
|                              |         | (b) Give reasons for non-participation at each stage                                                                                                                                              | 8            |
|                              |         | (c) Consider use of a flow diagram                                                                                                                                                                | Fig 1        |
| Descriptive data             | 14*     | (a) Give characteristics of study participants (eg demographic, clinical, social) and information on exposures and potential confounders                                                          | 8            |
|                              |         | (b) Indicate number of participants with missing data for each variable of interest                                                                                                               | 7, suppl.    |

|                          |     |                                                                                                                                                                                                              |               |
|--------------------------|-----|--------------------------------------------------------------------------------------------------------------------------------------------------------------------------------------------------------------|---------------|
| Outcome data             | 15* | Report numbers of outcome events or summary measures                                                                                                                                                         | 8             |
| Main results             | 16  | (a) Give unadjusted estimates and, if applicable, confounder-adjusted estimates and their precision (eg, 95% confidence interval). Make clear which confounders were adjusted for and why they were included | 8, Table 3,4  |
|                          |     | (b) Report category boundaries when continuous variables were categorized                                                                                                                                    | 6             |
|                          |     | (c) If relevant, consider translating estimates of relative risk into absolute risk for a meaningful time period                                                                                             | n/a           |
| Other analyses           | 17  | Report other analyses done—eg analyses of subgroups and interactions, and sensitivity analyses                                                                                                               | 9, suppl.     |
| <b>Discussion</b>        |     |                                                                                                                                                                                                              |               |
| Key results              | 18  | Summarise key results with reference to study objectives                                                                                                                                                     | 9-10          |
| Limitations              | 19  | Discuss limitations of the study, taking into account sources of potential bias or imprecision. Discuss both direction and magnitude of any potential bias                                                   | 11            |
| Interpretation           | 20  | Give a cautious overall interpretation of results considering objectives, limitations, multiplicity of analyses, results from similar studies, and other relevant evidence                                   | 9-12          |
| Generalisability         | 21  | Discuss the generalisability (external validity) of the study results                                                                                                                                        | 10            |
| <b>Other information</b> |     |                                                                                                                                                                                                              |               |
| Funding                  | 22  | Give the source of funding and the role of the funders for the present study and, if applicable, for the original study on which the present article is based                                                | online (none) |

\*Give information separately for exposed and unexposed groups.

**Note:** An Explanation and Elaboration article discusses each checklist item and gives methodological background and published examples of transparent reporting. The STROBE checklist is best used in conjunction with this article (freely available on the Web sites of PLoS Medicine at <http://www.plosmedicine.org/>, Annals of Internal Medicine at <http://www.annals.org/>, and Epidemiology at <http://www.epidem.com/>). Information on the STROBE Initiative is available at [www.strobe-statement.org](http://www.strobe-statement.org).
